# Supplementary material
Source: ML conference proceedings conference paper supplement (https://proceedings.neurips.cc/paper_files/paper/2019/hash/0a9fdbb17feb6ccb7ec405cfb85222c4-Abstract.html)
Supplement: Supplementary file [file 0a9fdbb17feb6ccb7ec405cfb85222c4-Supplemental.zip]

## A Appendix

### A.1 Proof of Theorem 3.1

*Proof.* Since  $P_{k\text{-ReLU},i}$  contains  $\mathcal{P}_{R,i} \neq \emptyset$  and both  $P_{k\text{-ReLU},i}$ ,  $\bigcap_{i=1}^k P_{1\text{-ReLU},\mathcal{I}_i}$  contain the same interval constraints, we have that  $P_{k\text{-ReLU},i} \subseteq \bigcap_{i=1}^k P_{1\text{-ReLU},\mathcal{I}_i}$ . We have by monotonicity of the intersection and the convex hull,

$$\left( \bigcap_{S_i \in \mathcal{S}_i} P_{k\text{-ReLU},i} \cap S_i \right) \subseteq \left( \bigcap_{S_i \in \mathcal{S}_i} \left( \bigcap_{u \in \mathcal{I}_i} P_{1\text{-ReLU},u} \right) \cap S_i \right) \quad (9)$$

For any  $S_i \in \mathcal{S}_i$ , we have that either  $S_i \subseteq \mathcal{C}_u^+$  or  $S_i \subseteq \mathcal{C}_u^-$  for any  $u \in \mathcal{I}_i$ . Thus, we can replace all  $S_i$  on the right hand side of (9) with either  $\mathcal{C}_u^+$  or  $\mathcal{C}_u^-$  such that for all  $u \in \mathcal{I}_i$  both  $\mathcal{C}_u^+$  and  $\mathcal{C}_u^-$  are used in at least one substitution and obtain by monotonicity,

$$\begin{aligned} &\subseteq \left( \bigcup_{j=1}^k \left( \left( \bigcap_{u \in \mathcal{I}_i} P_{1\text{-ReLU},u} \right) \cap \mathcal{C}_u^+ \right) \cup \left( \left( \bigcap_{u \in \mathcal{I}_i} P_{1\text{-ReLU},u} \right) \cap \mathcal{C}_u^- \right) \right) \\ &\subseteq \left( \bigcup_{u \in \mathcal{I}_i} (P_{1\text{-ReLU},u} \cap \mathcal{C}_u^+) \cup (P_{1\text{-ReLU},u} \cap \mathcal{C}_u^-) \right). \end{aligned}$$

For other  $i$ 's, it can be shown similarly that  $(\bigcap_{S_i \in \mathcal{S}_i} P_{k\text{-ReLU},i} \cap S_i) \subseteq (\bigcup_{u \in \mathcal{I}_i} (P_{1\text{-ReLU},u} \cap \mathcal{C}_u^+) \cup (P_{1\text{-ReLU},u} \cap \mathcal{C}_u^-))$  holds. Since  $\subseteq$  relation holds for at least one  $i$  and  $\subseteq$  holds for other  $i$ 's,  $P_{k\text{-ReLU}} \subseteq P_{1\text{-ReLU}}$  holds by the order preserving property of the intersection.  $\square$

### A.2 1-ReLU vs 2-ReLU vs 3-ReLU on the $9 \times 200$ network

We graphically show the precision and the average runtime of 1-ReLU, 2-ReLU, and 3-ReLU with no MILP and with one layer of MILP on the  $9 \times 200$  MNIST network with  $\epsilon = 0.015$  using the results from the evaluation section in Fig. 4.

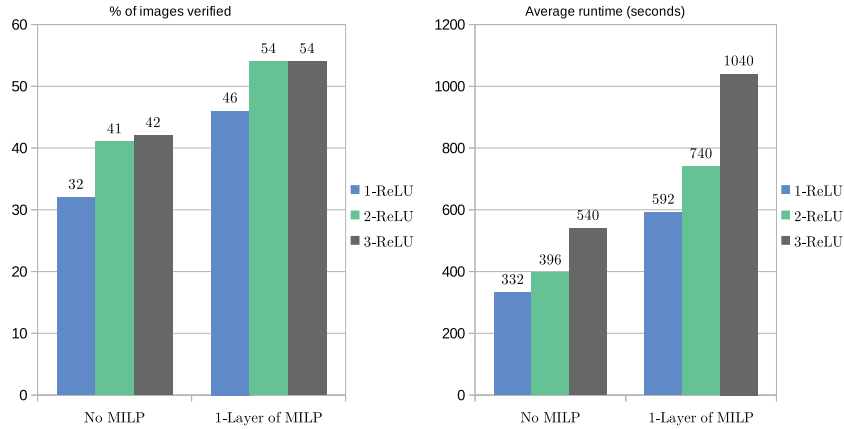

Figure 4: Percentage of images verified and the average runtime (in seconds) of 1-ReLU, 2-ReLU, and 3-ReLU on the  $9 \times 200$  MNIST network with  $\epsilon = 0.015$ .
